# Supplementary material
Source: PubMed Central journal article supplement (PMC4698790)
Supplement: NIHMS748490-supplement-Supplementary_Online_Content.pdf [file NIHMS748490-supplement-Supplementary_Online_Content.pdf]

## Supplementary Online Content

Hsieh MM, Fitzhugh CD, Weitzel RP, et al. Nonmyeloablative HLA-matched sibling allogeneic hematopoietic stem cell transplantation for severe sickle cell disease. *JAMA*. doi:10.1001/jama.2014.7192

**eFigure 1.** Study enrollment

**eFigure 2.** Narcotic use after transplant

**eTable 1A.** Selected transplant parameters in patients with engraftment or with graft failure

**eTable 1B.** Percent of donor chimerism at early time points after HSCT

**eTable 1C.** Red cell alloimmunization minor ABO incompatibility and engraftment status

**eTable 1D.** Fetal hemoglobin (HbF) data among patients with graft failure

**eTable 2.** Summary of serious adverse events

This supplementary material has been provided by the authors to give readers additional information about their work.

**Supplemental Figure 1. Study Enrollment.**

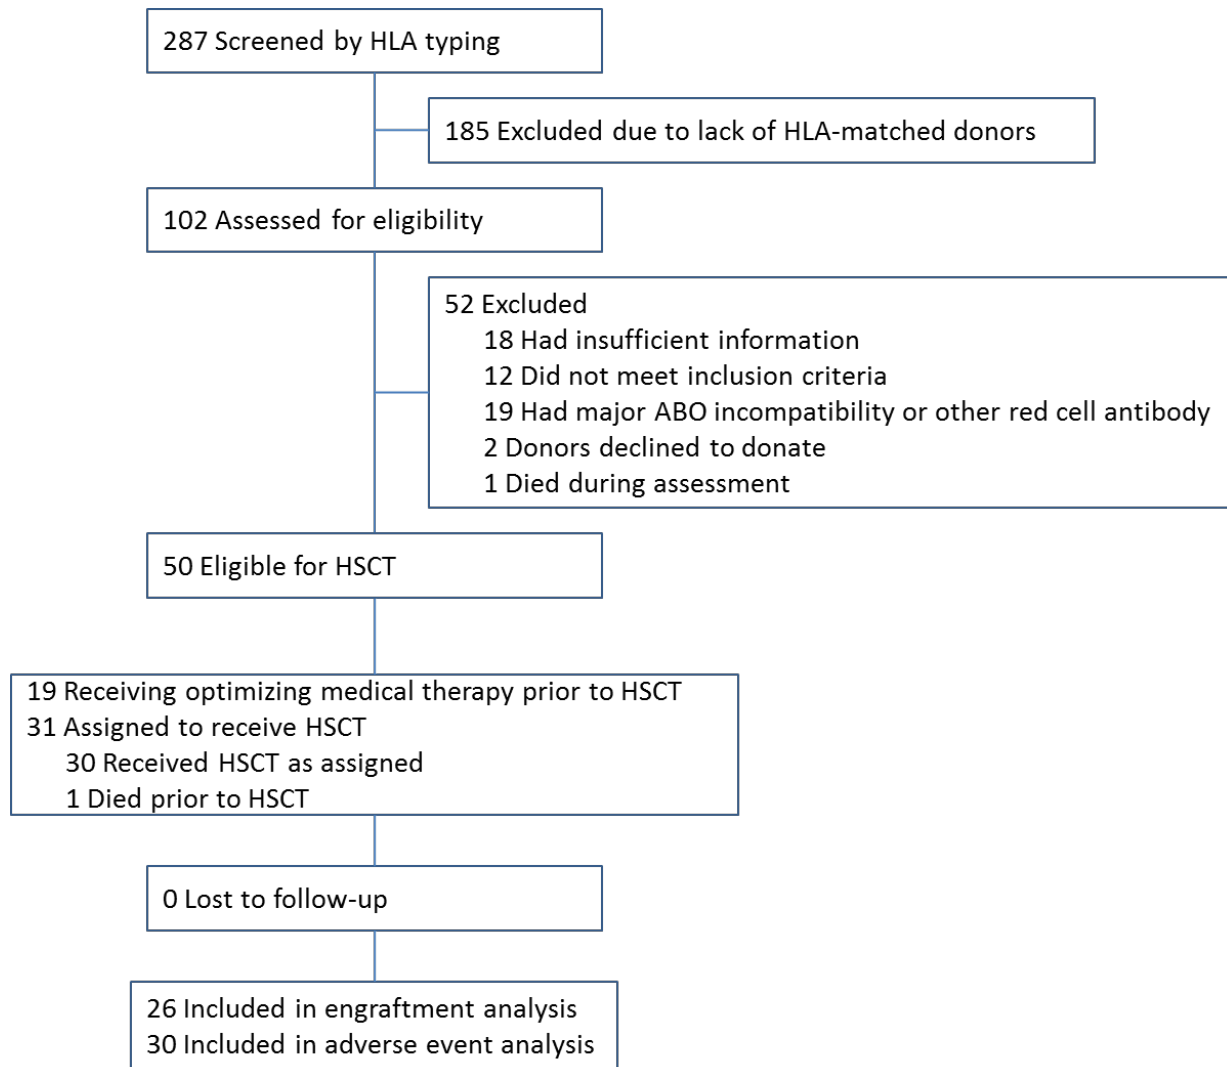

We are a transplant referral center and received many mail-in samples from within and outside the continental United States from patients and families who wanted to know their human leukocyte antigen (HLA) typing status. As a result, it was logistically easier to first perform the testing, then to request detailed medical information to determine eligibility when there is a match. HLA typing was performed in 287 patients and approximately 2 donors per patient, and 6/6 match was found in 102 patients. The medical care to prepare for transplantation included optimization of hydroxyurea, iron chelation, and treatment of concurrent co-morbidities (such as are proteinuria, renal insufficiency, avascular necrosis, or anticoagulation). During this optimization process, 19 patients were still in various stages of pre-transplant preparation, and could receive transplant when their health has been optimized. Four patients with secondary graft failure were not included in the engraftment analysis.

**Supplemental Figure 2.** Narcotic use post-transplant.

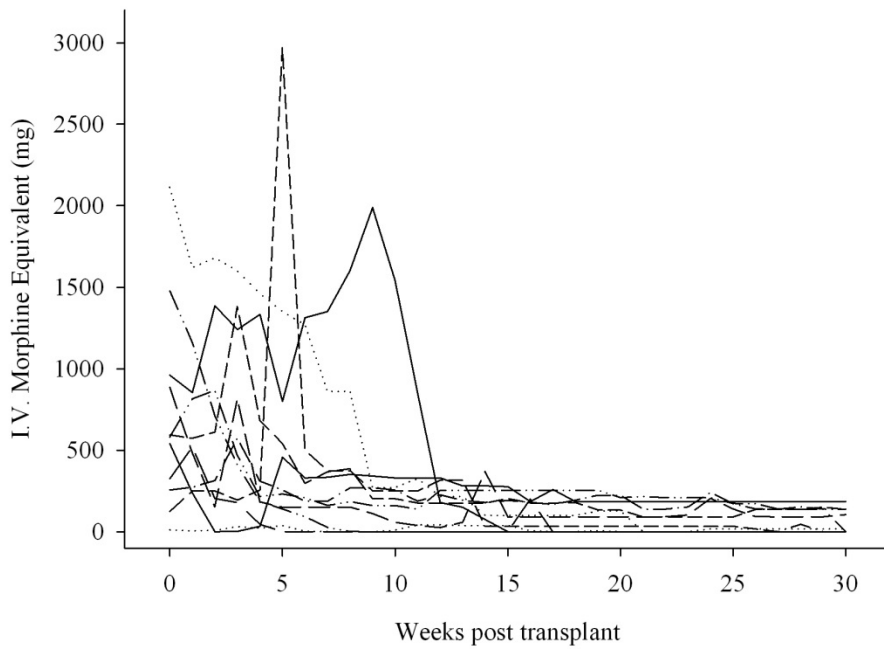

Mean intravenous morphine equivalent doses of narcotics per week of each patient (N=11) with respect to time after HSCT.

**Supplemental Table 1A.** Selected transplant parameters in patients with engraftment or with graft failure.

|                                                                                  | Long term engraftment<br>(N=26)                                 | Graft failure<br>(N=4)                                           |           |
|----------------------------------------------------------------------------------|-----------------------------------------------------------------|------------------------------------------------------------------|-----------|
| Median age (range)                                                               | 28.5 years (17-65)                                              | 27.5 years (16-31)                                               | P = 0.11* |
| Median CD34+ dose per kilogram of recipient body weight (range)                  | 14.6 x 10 <sup>6</sup> cells<br>(5.5 – 26.2 x 10 <sup>6</sup> ) | 13.2 x 10 <sup>6</sup> cells<br>(10.3 – 31.7 x 10 <sup>6</sup> ) | P = 0.80* |
| Median CD3+ dose per kilogram of recipient body weight (range)                   | 3.5 x 10 <sup>8</sup> cells<br>(1.6-9.4 x 10 <sup>8</sup> )     | 6.3 x 10 <sup>8</sup> cells<br>(2.8-7.6 x 10 <sup>8</sup> )      | P = 0.23* |
| Mean Pre-HSCT ferritin                                                           | 1532 mcg/L (39-4666)                                            | 1621 mcg/L (152-3926)                                            | P = 0.92^ |
| Red cell alloimmunization (history of or presence of red cell antibody pre-HSCT) | 6 of 26 patients                                                | 1 of 4 patients                                                  | P = 0.55# |

\*Wilcoxon rank test; ^ t-test; # Fisher's exact test.

**Supplemental Table 1B.** Percent of donor chimerism at early time points post-HSCT.

|                          | Long term engraftment<br>(N=26) |                         |                        | Graft failure<br>(N=4) |                       |            |
|--------------------------|---------------------------------|-------------------------|------------------------|------------------------|-----------------------|------------|
|                          | 1 month                         | 2 month                 | 3-4 month              | 1 month                | 2 month               | 3-4 month  |
| Median % CD14/15 (range) | 100<br>(67-100)                 | 100<br>(90-100)         | 100<br>(80-100)        | 97<br>(67-100)         | 85<br>(0-99)          | 0<br>(N/A) |
| N                        | 26                              | 26                      | 26                     | 4                      | 4                     | 3          |
| Standard error           | 1.21                            | 3.42                    | 6.24                   | 45.1                   | 33.6                  | 0          |
| 95% CI                   | (94.7, 99.7)                    | (87.7,100) <sup>a</sup> | (71.0, 96.7)           | (0, 100) <sup>b</sup>  | (0, 100) <sup>b</sup> | N/A        |
|                          |                                 |                         |                        |                        |                       |            |
| Median % CD3 (range)     | 12.5<br>(0-91)                  | 7<br>(0-55)             | 8<br>(0-33)            | 13<br>(0-27)           | 0<br>(0-2)            | 0<br>(N/A) |
| N                        | 26                              | 26                      | 25                     | 4                      | 4                     | 3          |
| Standard error           | 24.7                            | 16.8                    | 9.95                   | 7                      | 0.25                  | 0          |
| 95% CI                   | (0, 75.0) <sup>c</sup>          | (0, 48.0) <sup>c</sup>  | (0, 31.1) <sup>c</sup> | (0, 36.3) <sup>c</sup> | (0, 1.3) <sup>c</sup> | N/A        |

\*N/A, not applicable; <sup>a</sup> upper bound is truncated to 100; <sup>b</sup> both upper and lower bound are truncated to 0 and 100, respectively; <sup>c</sup> lower bound is truncated to 0.

**Supplemental Table 1C.** Red cell alloimmunization, minor ABO incompatibility, and engraftment status.

| Patient number | History of red cell antibodies | Minor ABO and Rh mismatch (recipient/donor) | Engraftment |
|----------------|--------------------------------|---------------------------------------------|-------------|
| 7              | Yes                            | No                                          | Yes         |
| 9              | Yes                            | No                                          | Yes         |
| 13             | Yes                            | No                                          | Yes         |
| 17             | Yes                            | No                                          | Yes         |
| 20             | Yes                            | No                                          | Yes         |
| 28             | Yes                            | Yes, (O+ / O-)                              | Yes         |
| 27             | Yes                            | Yes, (B+ / O+)                              | No          |
| 6              | No                             | Yes, (B+ / O+)                              | Yes         |
| 12             | No                             | Yes, (A+ / A-)                              | Yes         |
| 16             | No                             | Yes, (B+ / O+)                              | Yes         |
| 19             | No                             | Yes, (B+ / O+)                              | Yes         |
| 25             | No                             | Yes, (A+ / O+)                              | Yes         |

**Supplemental Table 1D.** Fetal hemoglobin (HbF) data among patients with graft failure.

| Patient number | Age at HSCT | HbF, 1 month pre-HSCT | Pre-HSCT hydroxyurea | HbF, 6 month post-HSCT | HbF, 12 month post-HSCT | HbF, most recent | Post-HSCT hydroxyurea |
|----------------|-------------|-----------------------|----------------------|------------------------|-------------------------|------------------|-----------------------|
| 4              | 16          | 24.6%                 | Yes                  | 35%                    | 26.8%                   | 17.5% (6 years)  | Yes                   |
| 14             | 25          | 22%                   | Yes                  | 18.5%                  | 15%                     | 22.8% (4 years)  | Yes                   |
| 15             | 31          | 10.8%                 | Yes                  | 26.5%                  | 24%                     | 20.2% (4 years)  | Yes                   |
| 27             | 30          | 13%                   | Yes                  | 6%                     | N/A                     | N/A              | No                    |

N/A, not available; most recent, at the most recent follow-up post-HSCT (median 4 years, range 4-6).

**Supplemental Table 2.** Summary of Serious Adverse Events (SAEs)

| Type of serious adverse events (SAEs) | Number                                                                                                                                                    | Subtotal |
|---------------------------------------|-----------------------------------------------------------------------------------------------------------------------------------------------------------|----------|
| Related to femoral catheter placement | 3 (all in donors)                                                                                                                                         | 3        |
| Death                                 | Pre-transplant, cause: cardiac, 1<br>Post-transplant, cause: intracranial bleeding from previous moyamoya disease after relapse of sickle cell disease, 1 | 2        |
| Other pain                            | Narcotic withdrawal, 2<br>Other arthralgia and/or myalgia, 5<br>Avascular necrosis, 1<br>Priapism, 1                                                      | 9        |
| Infection                             | C. difficile, 2<br>Babesia, 1<br>Skin abscess, 1<br>Malaria, 1<br>Pneumonia, 1                                                                            | 6        |
| Abdominal pain                        | Gastric ulcer, 1<br>Pancreatitis, 1<br>Hernia, 1<br>Not specified, 3                                                                                      | 6        |
| Related to sirolimus                  | Arthralgia, 2<br>Pneumonitis, 2<br>Fever, 1                                                                                                               | 5        |
| Transplant rejection                  | 4                                                                                                                                                         | 4        |
| Others                                | Rhabdomyolysis, 1<br>Deep vein thrombosis, 2<br>Bleeding: hematuria, 1; compartment syndrome, 1<br>Hypotension, 1<br>Muscle weakness, 1                   | 7        |
|                                       |                                                                                                                                                           | 42       |

As of October 25, 2013 (over 10 year accrual period), there were a total of 42 reported SAEs, which includes all hospitalizations. Three of them were from donors, and all were related to femoral catheter placement for stem cell collection. One SAE was a death from a recipient who died from cardiac arrhythmia prior to transplant. The remaining 38 SAEs were from 30 transplant recipients; 5 recipients had 21 SAEs combined. The details are summarized in the accompanying table.
